# Supplementary material
Source: PubMed Central journal article supplement (PMC5360874)
Supplement: NIHMS692364-supplement-SI.pdf [file NIHMS692364-supplement-SI.pdf]

## Supplementary Materials for

### **Neuregulin stimulation of cardiomyocyte regeneration in mice and human myocardium reveals a therapeutic window**

Brian D. Polizzotti, Balakrishnan Ganapathy, Stuart Walsh, Sangita Choudhury, Niyatie Ammanamanchi, David G. Bennett, Cristobal G. dos Remedios, Bernhard J. Haubner, Josef M. Penninger, Bernhard Kühn\*

\*Corresponding author. E-mail: bernhard.kuhn2@chp.edu

Published 1 April 2015, *Sci. Transl. Med.* **7**, 281ra45 (2015)

DOI: 10.1126/scitranslmed.aaa5171

#### **This PDF file includes:**

Materials and Methods

Results

Fig. S1. Contribution of cardiomyocyte proliferation to regeneration.

Fig. S2. Cryoinjured hearts showed loss of sarcomeric organization.

Fig. S3. Characterization of myocardial repair after cryoinjury.

Fig. S4. Transmural scar persists even after 7 months after cryoinjury.

Fig. S5. Visualization of scar and quantification of cardiac function by MRI from early administration group.

Fig. S6. Visualization of scar and quantification of cardiac function by MRI for late administration group.

Fig. S7. Time course of myocardial repair after cryoinjury from early rNRG1 administration group.

Fig. S8. Time course of myocardial repair after cryoinjury from late rNRG1 administration group.

Fig. S9. Failure to visualize transmural scars with late gadolinium enhancement due to low spatial resolution of cMRI in mice.

Fig. S10. Schematic representation illustrating the nongenetic labeling technique with CFSE.

Fig. S11. rNRG1-stimulated cardiomyocyte proliferation in infants is age-dependent (2-month-, 6-month-, 1.5- to 5-year-, and 10-year-old patients).

Reference (46)

Table S1 (Microsoft Excel format). List of all differentially expressed genes between the BSA and rNRG1 treatment groups relative to sham mice ( $P < 0.05$ ).

Table S2. Clinical information of patients with heart disease analyzed for Fig. 6C (H3P activity over age).

Table S3. Clinical information for normal hearts analyzed for Fig. 6C (H3P activity over age).

Table S4. Clinical information of patients with heart disease analyzed for Fig. 7D (rNRG1 stimulation).

Table S5. Clinical information of patients with heart disease analyzed for Fig. 8G (CFSE assay).

Table S6. Comparison of tissue response after cryoinjury in mice and myocardial disease in human infants (myocardial dysfunction, scar formation, and decreased cardiomyocyte cycling).

Table S7. Antibody manufacturers and dilutions.

Table S8. Image acquisition hardware and settings.

Table S9. Quantification of numeric data.

Table S10. Human primers for quantitative RT-PCR for calculation of fold change in expression levels.

Table S11. Mouse primers for quantitative PCR for calculation of fold change in expression levels.

**Other Supplementary Material for this manuscript includes the following:**

(available at [www.sciencetranslationalmedicine.org/cgi/content/full/7/281/281ra45/DC1](http://www.sciencetranslationalmedicine.org/cgi/content/full/7/281/281ra45/DC1))

Fig.S3.data.pdf

Fig.S5.data.pdf

Fig.S6.data.pdf

Fig.S7.data.pdf

Fig.S8.data.pdf

Fig.S11.data.pdf

Table S1.GeneExpressionData.xlsx

Movie S1 (.mov format). BSA-treated mouse from early administration.

Movie S2 (.mov format). rNRG1-treated mouse from early administration.

Movie S3 (.mov format). BSA-treated mouse from late administration.

Movie S4 (.mov format). rNRG1-treated mouse from late administration.

Movie S5 (.mov format). 3D reconstructions show myocardial syncytium adjacent to the scar after early administration (64 dpi).

## SUPPLEMENTARY MATERIALS AND METHODS

### Considerations of rNRG1 concentration *in vitro* and rNRG1 dose *in vivo*.

We (22) and others (30) have shown that 100 ng/mL and 100 ng/g body weight of rNRG1 is sufficient to induce cardiomyocyte cycling in culture and adult mice. Our rationale for using 100 ng/mL in culture and 100 ng/g body weight in this study was to be able to reach concentrations that were previously shown to be able to stimulate cardiomyocyte cycling *in vitro*.

**Quantification of myocardial function *in vivo* with echocardiography and cMRI.** We performed sedated (1 - 1.5% isoflurane and 1 L/min oxygen) echocardiography using a Vevo 2100 device (VisualSonics) with a 30 MHz probe. M-mode recordings were obtained in the left parasternal short axis view and endocardial measurements were made on three consecutive cardiac cycles, repeated 9 times, for a total of 27 cardiac cycles per mouse for each data point. For cardiac cine-MRI, mice were anesthetized with 1-3% isoflurane in oxygen (1 L/min) and positioned prone in a purpose built cradle, containing a water-heated jacket to maintain body temperature. Respiration and ECG were monitored using a small-animal physiological monitoring system (SA Instruments, Inc.). The cradle was moved into a 9.4 T horizontal bore magnet (Bruker Biospin MRI, Billerica, MA, USA). A 40 mm inner-diameter quadrature volume coil (Bruker Biospin) was used for radio-frequency transmission and MR signal reception. For the late administration experiment, gadolinium was injected intraperitoneally at a dose of up to 0.3 millimoles/kg and imaged after 20 min. A stack of 6-7 contiguous 1 mm thick true short-axis cardiac-gated cine-FLASH bright-blood images (repetition time 20 ms; echo time 2.8 ms; 30 degree flip angle excitation pulse; field of view 2.56x2.56 cm; matrix size 256x256; voxel size 100x100x1000  $\mu\text{m}$ ; 5 frames per cardiac cycle) were acquired from base to apex. In the early administration experiment, short-axis images of the heart were acquired with the self-gating technique IntraGate (Bruker Biospin MRI, Billerica, MA, USA). The IntraGate technique is based on a fast low-angle shot (FLASH) gradient-echo pulse sequence with an extra gradient echo in which the respiration and cardiac motion information is embedded (46). Using IntraGate, a stack of 6-7 contiguous 1 mm thick true short-axis self-gated cine-FLASH bright-blood images was acquired from apex to base. A separate 5 mm-thick navigator slice was carefully placed over the inflow tract of the ventricles in order to create the navigator gradient echo. A space of 0.5 mm was proscribed between the navigator slice and the last imaging slice. Voxel size in the short-axis slices acquired with IntraGate was 125x125x1,000  $\mu\text{m}$ . The scan time per slice was approximately 3 minutes resulting in a total scan time of approximately 18-21 minutes per mouse.

**Histology and quantitative morphometry.** Mouse hearts were resected, washed in 50 mM KCl in PBS, weighed, and fixed in 3.7% (vol/vol) formaldehyde overnight. Hearts were then washed with PBS, equilibrated in a 30% (wt/vol) sucrose solution at 4°C overnight, and mounted in tissue freezing medium (Triangle Biomedical Biosciences #TFM-5).

Cryosections (18-20  $\mu\text{m}$  thickness) were prepared with a Micron HM 550 (ThermoScientific) and re-fixed in 3.7% (vol/vol) formaldehyde for 15 min. For staining and analysis, sections were selected every 500  $\mu\text{m}$ . For morphometry, 6-12 sections of each heart (~500  $\mu\text{m}$  apart) were analyzed visually using either a Zeiss Axioplan 2 epifluorescent microscope with Plan-Neofluar 10x and 40x lens equipped with a Zeiss Axiocam CCD camera. To quantify scar, we analyzed 2x images of AFOG stained sections where fibrosis appears blue, which was digitally thresholded with Metamorph. The total scar volume ( $\text{mm}^3$ ) was calculated by summing the scar area per tissue section multiplied by the distance between the selected sections (0.5  $\text{mm}^3$ ):

$$\text{Total scar volume (mm}^3\text{)} = \sum_{i=1}^n (\text{Scar area}_i \times 0.5\text{mm})$$

where  $n$  is the total number of sections (6-12) and  $i$  is the first section starting at the apex. The scar size (% of myocardium) was determined by dividing the total scar volume by the total myocardial volume, determined by thresholding the red region (muscle):

$$\text{Scar size (\% of myocardium)} = \frac{\sum_{i=1}^n (\text{Scar area}_i \times 0.5\text{mm})}{\sum_{i=1}^n \text{Muscle area}_i \times 0.5\text{mm}} \times 100\%$$

**Immunofluorescence microscopy and quantification of cell cycle activity.** Cryosections (20  $\mu\text{m}$ ) were fixed in 3.7% (vol/vol) formaldehyde, permeabilized with 0.5% (vol/vol) NP-40 in PBS, and blocked with goat serum (20%, vol/vol, Sigma). To identify cardiomyocytes, we used primary antibodies against sarcomeric  $\alpha$ -actinin (Sigma, 1:500). Karyokinesis was detected with an antibody against phosphorylated histone H3 (Upstate, 1:500). A monoclonal antibody against the Aurora-B kinase (Abcam, 1:1,000) was used to detect cytokinesis. The gap junctions were detected with a Connexin 43 antibody (Abcam, 1:200). Visualization was accomplished with secondary antibodies conjugated to either Alexa Fluor 488 or 594. Nuclei were visualized with 4', 6'-diamidino-phenylindole (DAPI, Invitrogen, 1:10,000) or Hoechst dye (1:1,000). Apoptosis was visualized with the ApopTag Red Kit (Millipore). Cardiomyocyte cell cycle activity was determined by manual counting of H3P positive CM nuclei. We analyzed 5 sections per heart (spaced approximately 600  $\mu\text{m}$  apart). The area of each tissue section was determined using the method of point counts and the ratio of H3P CM nuclei per area of myocardium was calculated. Confocal images were obtained according to the information provided in **Supplemental Table S8**.

**RNA-Seq sample preparation.** Total RNA from mouse hearts was isolated using RNeasy Micro kit (Qiagen) using manufacturer's protocol. Each sample was assessed using Qubit 2.0 fluorometer and Agilent Bioanalyzer TapeStation 2200 for RNA quantity and quality. The mRNA molecules were purified using poly-T oligo attached magnetic beads and fragmented. The cleaved RNA fragments were reverse transcribed into first strand cDNA using reverse transcriptase and random primers. The cDNA library was constructed using the TruSeq Stranded mRNA kit (Illumina, San Diego, CA, USA).

The cDNA libraries were validated using KAPA Biosystems primer premix kit with Illumina-compatible DNA primers and Qubit 2.0 fluorometer. Quality was examined again using Agilent Bioanalyzer TapeStation 2200. The cDNA libraries were then pooled at a final concentration 1.8  $\mu\text{M}$ . Sequencing was performed on NextSeq 500 instruments (Single-stranded, single-end indexed, 75 bp per read) at a depth of  $35 \times 10^6$  per sample.

**RNA-Seq analysis.** Sequencing analysis was done using mRNA-Seq for differential expression in eukaryotes by Maverix Biomics (build 2.9). Raw sequencing reads (75bp, single read) were quality checked for potential sequencing issues and contaminants using FastQC. Adapter sequences, primers, Ns, and reads with quality score below 28 were trimmed using fastq-mcf of ea-utils and PRINSEQ. Reads with a remaining length of less than 20 bp after trimming were discarded. Single reads were mapped to the mouse genome (m10) using STAR in a strand specific manner. Read coverage on forward and reverse strands for genome browser visualization was computed using SAMtools, BEDtools, and UCSC Genome Browser utilities. Pairwise differential expression was calculated using Cuffdiff. Cufflinks was used to determine FPKM levels for each gene from the STAR

alignment and was used as input for Cuffdiff. All treatment groups were normalized to sham. Read counts were then normalized across all samples. Genes with significant change of expression were defined by an adjusted P-value < 0.05. Genes were sorted using log<sub>2</sub> fold change as a sorting parameter. Functional annotation clustering was performed on David Bioinformatics Resource 6.7 online software.

**Organotypic culture of human myocardium.** Organotypic culture was performed as previously described with modifications (38). Briefly, specimens were transferred to ice-cold Ca<sup>2+</sup> free Krebs-Ringer saline solution consisting of: 10 mM HEPES, 129 mM NaCl, 4.7 mM KCl, 1.2 mM KH<sub>2</sub>PO<sub>4</sub>, 1.2 mM MgSO<sub>4</sub>·7H<sub>2</sub>O, 5 mM NaHCO<sub>3</sub>, 5.5 mM glucose, 2 mg/ml bovine serum albumin (BSA), supplemented with 20 mM taurine, 2 mM L-carnitine, 5 mM creatine, and 30 mM 2,3-butanedione monoxime, pH 7.4. Medium 199 (M199, Gibco) or DMEM (Gibco) supplemented with 20 mM taurine, 2 mM L-carnitine, 5 mM creatine, 2 mg/ml BSA, 100 μU/ml penicillin and 100 μg/ml streptomycin, 1% heat inactivated fetal bovine serum (FBS, Gibco), or with 10<sup>-7</sup> mM insulin (Roche). Prior to culture, samples were sliced 400-500 μm thick and cultured in laminin-coated 24-well plates (Costar) or 35-mm tissue culture dishes (Becton Dickinson). rNRG1 (100 ng/mL, R&D Systems, catalog#396-HB-050/CF) was added and organotypic cultures were maintained for 72 hours.

## **SUPPLEMENTARY RESULTS**

**Percentage of H3P cardiomyocytes at 1dpi.** To determine the percentage of H3P cardiomyocytes at 1dpi, we divided the number of H3P cardiomyocytes (identified by fluorescence microscopy) by the total number of cardiomyocytes in the sampled volume. The total number of cardiomyocytes in the sample volume was determined by multiplying the known sample volume by the cardiomyocyte density. To determine cardiomyocyte density, we first calculated the number of remaining cardiomyocytes 1 day after injury. Results from our TUNEL analysis showed that BSA treated animals lost an average of 29.29% of their myocardium whereas rNRG1 treated animals only lost 15.72% at 1dpi. Assuming that there are  $1 \times 10^6$  cardiomyocytes/ heart at 1 day of life, this leaves approximately 707,100 and 842,800 remaining cardiomyocytes for BSA and rNRG1 treated animals respectively (16). To calculate the cardiomyocyte density (cardiomyocytes/  $\text{mm}^3$ ) we divided the number of cardiomyocytes remaining by the volume of viable myocardium. This calculation suggests that the cardiomyocyte density was  $3.01 \times 10^5$  cardiomyocyte/ $\text{mm}^3$  for both BSA (707,100 cardiomyocytes/  $2.35 \text{mm}^3$ ) and rNRG1 (843,800 cardiomyocytes/  $2.78 \text{mm}^3$ ) treated animals at 1dpi. This result gives 0.02% and 0.04% H3P positive cardiomyocytes for BSA and rNRG1 treated animals. It is important to note that this calculation represents a underestimate of the number of H3P cells. This is due to limitations inherent to imaging tissue sections 20 micrometers thick (9).

**Number of preserved cardiomyocytes.** To determine if rNRG1 had a cardioprotective effect, we first examined the injury size following surgery. Morphometric analysis of hematoma size at 1 day post injury (dpi) shows no difference between BSA and rNRG1 treated animals (it is also worth noting that surgeries were preformed in a blinded fashion - i.e. the surgeon was unaware of the treatment group prior to surgery). We then calculated the number of remaining CMs 1 day after injury. Results from our TUNEL analysis showed that BSA treated animals lost an average of 29.29% of their myocardium whereas rNRG1 treated animals only lost 15.72% at 1dpi. These results suggest that rNRG1 protects against cell death following cryoinjury. Assuming that there are  $1 \times 10^6$  cardiomyocytes/heart at 1 day of life, this leaves approximately 707,100 and 842,800 remaining CMs for BSA and rNRG1 treated animals. In conclusion, rNRG1 treatment preserves approximately 136,000 cardiomyocytes.

**Cardiomyocyte density and number at 34dpi.** In order to determine if cardiomyocyte proliferation contributed to the regenerative process, we first counted the number of myocytes nuclei in the heart using unbiased stereology techniques. Using the optical dissector principle, we determined that the volume density of cardiomyocyte nuclei was  $5.5 \times 10^4$  and  $6.8 \times 10^4$  cardiomyocytes nuclei/ $\text{mm}^3$  for BSA and rNRG1 treated animals. At 34 dpi, the percent of mono- and binucleated cardiomyocytes is roughly 20:80, which this equates to  $3.1 \times 10^4$  and  $3.8 \times 10^4$  cardiomyocytes/  $\text{mm}^3$ . Using the myocardial volume, determined using the point counts method, we calculated the total number of cardiomyocytes/heart to be  $1.79 \times 10^6$  and  $2.15 \times 10^6$  cardiomyocytes at 34 dpi in BSA and rNRG1-treated animals respectively. This equates to an increase of 355,556 cardiomyocytes in rNRG1 treated animals (or  $\sim 6940$  cardiomyocytes/ $\text{mm}^3$ ). Histological analysis showed no difference in heart weight/body weight, heart weight/ tibia length, or in cardiomyocytes size, suggesting that the observed increase in cardiomyocyte density is due to treatment with rNRG1.

**Contribution of preserved cardiomyocytes to regeneration.** To determine the contribution of cardioprotection to regeneration, we first determined the percent of H3P positive cardiomyocytes at 1dpi in rNRG1 treated animals (described above). This yields approximately 0.04% H3P CMs for rNRG1 treated animals. We know that cardioprotection rescued approximately 136,000 CMs. Assuming 0.04% of these cells proliferate according to published values (i.e. 1.8 hrs for karyokinesis, ref. 21) for 34 days, yields 25,000 new CMs. It is important to note that this calculation is most likely an overestimate, as it assumes a linear proliferation rate for 34 days and assumes no binucleation events occur.

**Contribution of cardiomyocyte proliferation to regeneration.** To determine if endogenous cardiomyocyte proliferation could account for the increase in the number of cardiomyocytes (determined via stereology) we used our quantitative analysis of our H3P data to estimate the expected number of new cardiomyocytes using a linear regression model. H3P positive cardiomyocytes/mm<sup>3</sup> were quantified at 1, 10, and 34 days post injury for BSA and rNRG1 treated animals. The number of H3P positive cardiomyocytes/mm<sup>3</sup> was plotted versus days post injury and a linear regression line was drawn (**Suppl. Fig. S1A**). To determine the number of cardiomyocytes/mm<sup>3</sup> generated over the 34 day period, the graph was first segmented into the following days: 0-5 (segment 1), 5-6 (segment 2), 6-7 (segment 3), 7-8 (segment 4), 8-10 (segment 5), and 10-34 (segment 6) (Lines were drawn from the x-axis to the linear regression at the following dpi's: 5,6,7,8, and 10). The segmentation is needed to correct for the fraction of cardiomyocytes that binucleate. The area of each segment represents the total number of H3P positive cardiomyocytes/mm<sup>3</sup> for that time period. To calculate the area of each segment, a line was first extrapolated to the y-axis using the linear regression equation. This divides the segment into a triangle and a rectangular. An example is shown for segment 2 (i.e. from 5 dpi to 6 dpi, **Suppl. Fig. S1B**). The total area is calculated by summing the areas of the rectangle ( $A = \text{length} \times \text{width}$ ) and the triangle ( $A = 1/2 (\text{base} \times \text{height})$ ). The number of cardiomyocytes/mm<sup>3</sup> is then calculated assuming published proliferation rates (i.e. 1.8 hrs to complete karyokinesis) by multiplying the Area x Days in the segment x 24 hrs x 1/1.8hrs x % mononucleation (% mononucleation was determined from literature: 1-5 = 100%, 5-6 = 80%, 6-7 = 40%, 7-8 = 25%, > 8 = 10%). Summing the cardiomyocytes/mm<sup>3</sup> over all time segments yields the total cardiomyocytes/mm<sup>3</sup> over the 34-day period. If one assumes a 25% standard deviation (given the inherent error with the model i.e. continuous proliferation for 1.8hrs, etc) this give a range of  $1.8\text{-}3.0 \times 10^4$  cardiomyocytes/mm<sup>3</sup> and  $3.5\text{-}5.8 \times 10^4$  cardiomyocytes/mm<sup>3</sup> in the injury zone for BSA and rNRG1-treated animals, respectively. This value is within the range of cardiomyocytes/mm<sup>3</sup> in the whole determined by stereology techniques ( $3.1 \times 10^4$  cardiomyocytes/mm<sup>3</sup> vs  $3.8 \times 10^4$  cardiomyocytes/mm<sup>3</sup>). This result supports the observed increase cardiomyocyte density from 1 to 34 dpi and suggests rNRG1 stimulates endogenous CM proliferation.

**Enhanced proliferation rate in rNRG1-treated animals.** To estimate the increase in the absolute number of cardiomyocytes generated in rNRG-1 treated animals we plotted the difference in the absolute number of cardiomyocytes/mm<sup>3</sup> between BSA and rNRG1 treated animals (as calculated by H3P data). There is a dramatic and rapid increase in the number of cardiomyocyte/mm<sup>3</sup> from 1 to 10 dpi (slope = 3661 cardiomyocytes/mm<sup>3</sup>/day, **Fig. 3K**). In other words, rNRG1 generates 36,661 additional cardiomyocytes/mm<sup>3</sup> in 10 days, relative to BSA treated animals, which accounts for approximately 78% of the total number of new cardiomyocytes generated. After day 10, the rate of cardiomyocyte proliferation decreases significantly (slope = 95.82 cardiomyocytes/mm<sup>3</sup>/day), which would result in approximately 2299 new cardiomyocytes/mm<sup>3</sup> from day 10 to 34.

**Relative contributions of cardiomyocyte proliferation from preserved and endogenous muscle to regeneration.** As calculated above, we estimate that approximately 360,000 new cardiomyocytes are generated in rNRG1 treated animals. 136,000 cardiomyocytes are due to preservation, which means that 224,000 were produced from regeneration of endogenous muscle. 25,000 are due to proliferation of preserved muscle (See contribution of preserved cardiomyocytes to regeneration) or approximately 11% ( $25000/224,000 * 100$ ). Given that recent publications suggest that stem cells do not significantly contribute to regeneration in mice we attribute remaining ~89% to endogenous cardiomyocyte proliferation.

**Relative contributions of preservation and cardiomyocyte proliferation to myocardial repair.** Animals treated with rNRG1 from birth have an additional ~360,000 cardiomyocytes compared to BSA controls. rNRG1 protected 136,000 cardiomyocytes from death, therefore we estimate that preservation accounts for ~38% of the observed increase in cardiomyocyte content ( $136,000/360,000 = 0.38$ ) at 34dpi. We estimate that approximately 25,000 cardiomyocytes are produced from the 136,000 cardiomyocytes preserved from rNRG1 treatment. This leaves 199,000 cardiomyocytes ( $360,000 - 136,000 - 25,000 = 199,000$ ) formed by endogenous cardiomyocyte proliferation, and accounts for 62% ( $(199,000 + 25,000)/360,000$ ) of the observed increase in cardiomyocyte number.



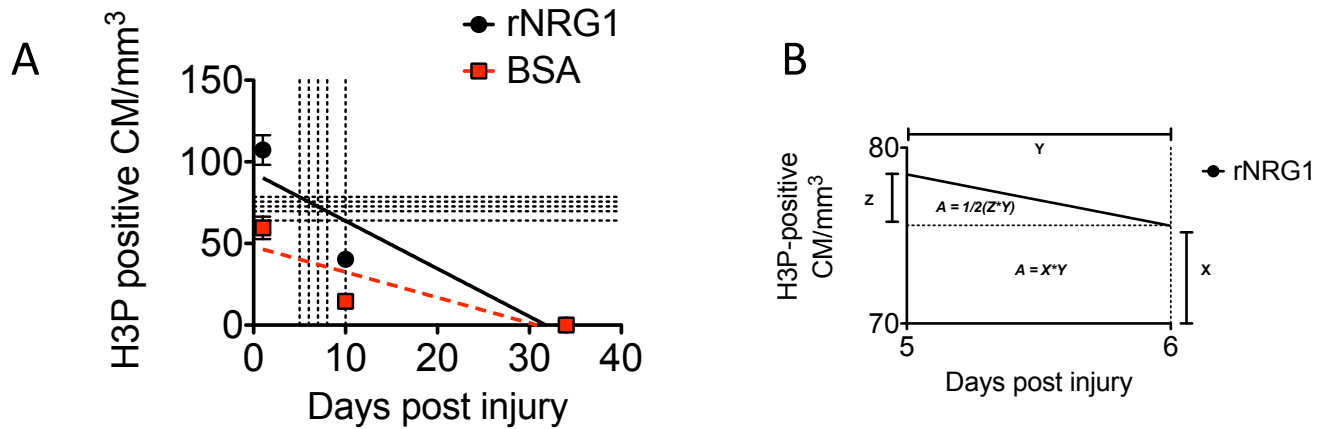

**Suppl. Fig. S1. Contribution of cardiomyocyte proliferation to regeneration. (A)** A graph of the number of H3P positive cardiomyocytes was plotted as a function of time (i.e. days post injury) and a linear regression analysis was performed. The linear regression was segmented into six different time points to account for the fraction of cardiomyocytes that binucleate during the first week of life. **(B)** To estimate the number of new cardiomyocytes generated the area of each segment was calculated using the equation: Area x Days in segment x 24hrs x rate of proliferation (1/1.8hrs) x % mononucleation (determined from literature). Summing the cardiomyocytes/mm<sup>3</sup> over all time segments yields the total number of cardiomyocytes/mm<sup>3</sup> over the 34-day period.

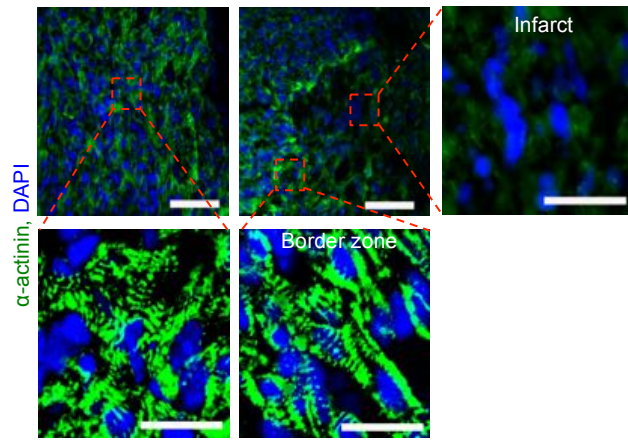

**Fig. S2. Cryoinjured hearts showed loss of sarcomeric organization.** Tissue sections were stained with antibodies against  $\alpha$ -actinin. The injured area has less sarcomeric signal and less striations. Scale bars: 100  $\mu$ m (top) and 20  $\mu$ m (bottom)

**Fig. S3. Characterization of myocardial repair following cryoinjury.**

[See fig.S3.data.pdf]

Hearts were sectioned in long axis and sections were selected every 500  $\mu$ m and stained with Masson Trichrome Staining. Blue = scar, Red = muscle, 30 dpi.

BSA- 7765

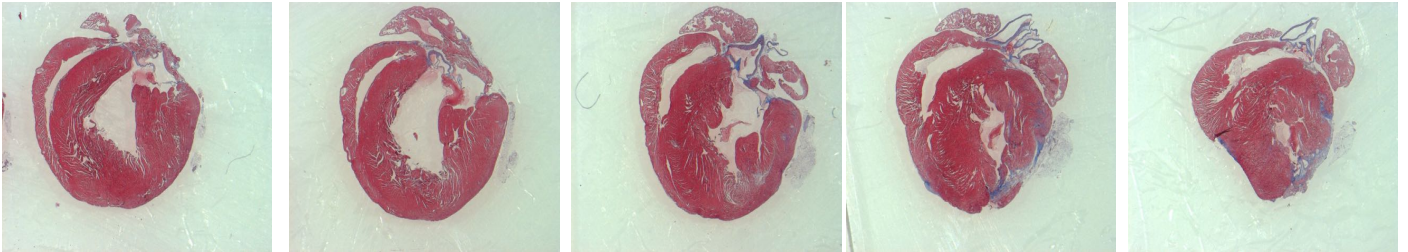

**Fig. S4. Transmurular scar persists even after 7 months following cryoinjury.** Hearts were sectioned in long axis and sections were selected every 500  $\mu\text{m}$  and stained with Masson Trichrome Staining. Blue = scar, Red = muscle, 210 dpi, early administration, BSA.

**Fig. S5. Visualization of scar and quantification of cardiac function by MRI from early administration group. [See fig.S5.data.pdf]**

Ten consecutive frames from one cardiac cycle were acquired from five to six different planes (spaced one millimeter apart) for each mouse analyzed. Animals were analyzed at 34 (a) or 64 dpi (b).

**Fig. S6. Visualization of scar and quantification of cardiac function by MRI for late administration group. [See fig.S6.data.pdf]**

Five consecutive frames from one cardiac cycle were acquired from six different planes (spaced one millimeter apart) for each mouse analyzed. Animals were analyzed at 34 (a) or 64 dpi (b).

**Fig. S7. Time course of myocardial repair following cryoinjury from early rNRG1 administration group. [See fig.S7.data.pdf]**

Tissue sections were selected every 500  $\mu\text{m}$  and stained with acid-fuchsin orange-G. Blue = scar, Red = muscle, Orange = clot. 10, 30, and 60 dpi.

**Fig. S8. Time course of myocardial repair following cryoinjury from late rNRG1 administration group. [See fig.S8.data.pdf]**

Tissue sections were selected every 500  $\mu\text{m}$  and stained with acid-fuchsin orange-G. Blue = scar, Red = muscle, Orange = clot. 10, 30, and 60 dpi.

APEX + 1 mm

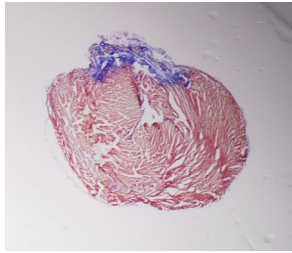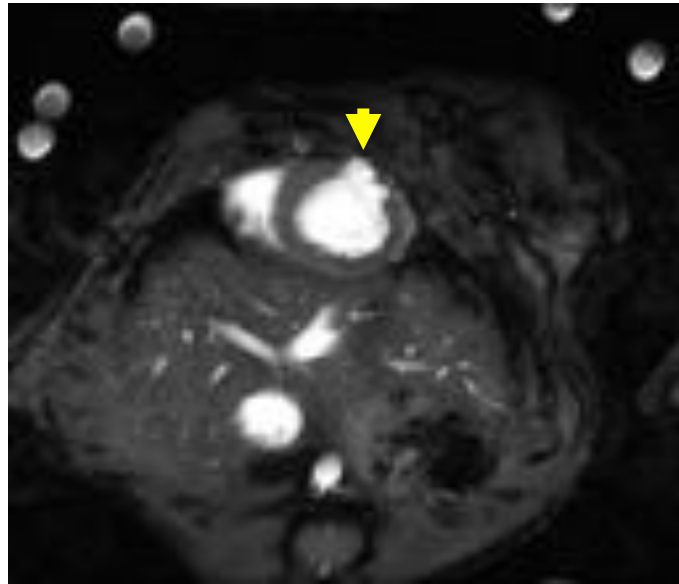

APEX + 2 mm

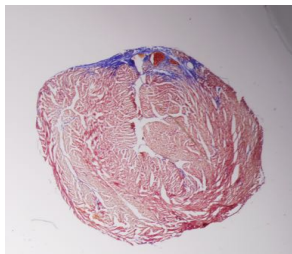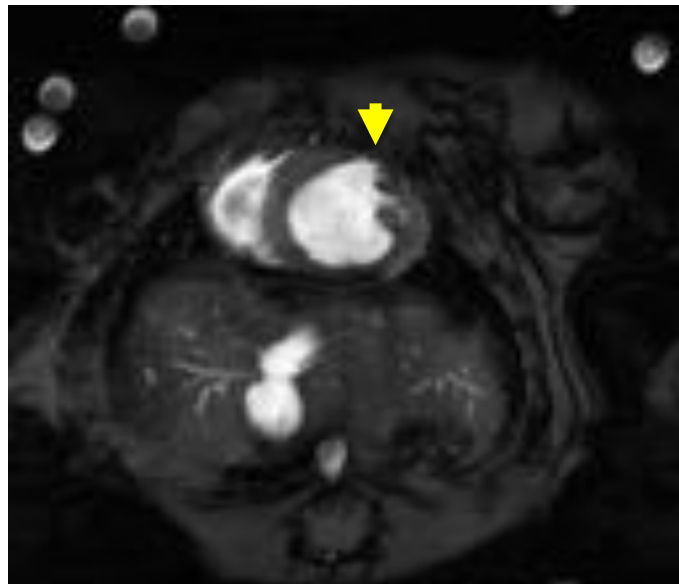

**Fig. S9. Failure to visualize transmural scars with late gadolinium enhancement due to low spatial resolution of cMRI in mice.** Mice underwent cryoinjury on day 1 of life (P1) and were treated with BSA from P5 (late administration). cMRI (with a 9.4 Tesla magnet) and heart resections were performed at 64 dpi. Hearts were sectioned in short axis and sections stained with acid fuchsin orange G (left panels). The position of the sections from apex is indicated on the left. cMRI images (right panels) corresponding to the level of AFOG sections do not show gadolinium enhancement in the region of transmural scars. Yellow arrows indicate region corresponding to scar. Blue = scar, Red = muscle.

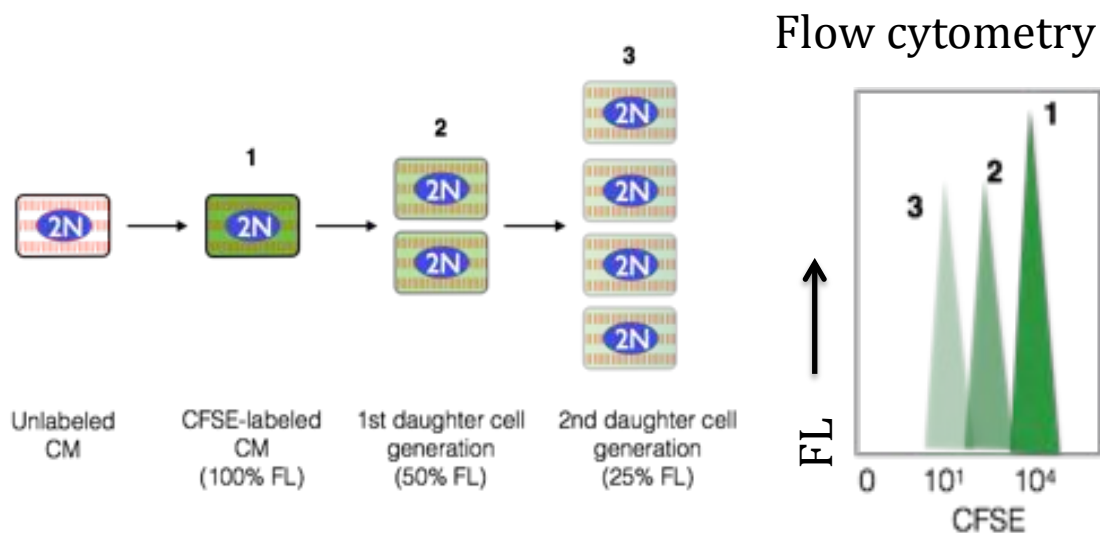

**Fig. S10. Schematic representation illustrating the non-genetic labeling technique with CFSE.** Organotypic cultures are treated with carboxyfluorescein succinimidyl ester (CFSE) which is taken up by the cell where it binds to proteins in the cytoplasm. Each division results in a decrease in the intensity of the CFSE dye by approximately 50% indicated by lighter hue of green. Quantification is accomplished by dissociation of the organotypic tissue sample followed by FACS analysis. FL, fluorescence intensity.

**Fig. S11. rNRG1 stimulated cardiomyocyte proliferation in infants is age-dependent (2 months, 6 months, 1.5-5 year and 10 year old patients).** [See fig.S11.data.pdf]

Human heart tissue samples were labeled with CFSE and cultured in organotypic culture in the presence of BSA/ rNRG1. Left column of panels shows scatter profiles of cardiomyocytes from 2 month-old patients (**Table S5**). Size and cellular complexity scatter profiles were used to enrich for the CM fraction, FSC/SSC high (**left panels**). The second column of panels shows how doublets were discriminated as a function of FSC-H and SSC-W. The third column of panels shows exclusion of dead cells by 7-AAD uptake. The right panels show assessment of rNRG1-stimulated proliferating myocardial cells (green outline), rNRG1 un-stimulated, but CFSE-loaded samples were used as controls (red outline) (**right panels**). CFSE-low populations were defined as populations having undergone cell-divisions (green gate), and the CFSE-high population withdrawn from the cell cycle, or not having undergone cytokinesis during the chase period.

**Table S1. List of all differentially expressed genes between BSA and rNRG1 treatment groups, relative to sham mice ( $P < 0.05$ ).** Mice underwent cryoinjury on day 1 of life (P1) and were treated with BSA or rNRG1 from day of birth (P0, early administration) till P12. Gene list shows 622 genes whose expression was significantly different ( $P < 0.05$ , Student's t-test) in BSA- and rNRG1 treated mice relative to sham mice.

**[See Table S1.GeneExpressionData.xlsx]**

**Table S2. Clinical information of patients with heart disease analyzed for Figure 6C (H3P activity over age).**

| <b>Pt.no.</b> | <b>Age</b> | <b>Gender</b> | <b>Cardiac Disease</b> | <b>Site</b> | <b>Type of surgery</b> | <b>SpO<sub>2</sub> (%)</b> | <b>LVEF (%)</b> |
|---------------|------------|---------------|------------------------|-------------|------------------------|----------------------------|-----------------|
| 1             | 4D         | M             | VSD                    | RV          | Repair                 | ND                         | 54              |
| 2             | 7D         | NA            | NA                     | NA          | Repair                 | NA                         | NA              |
| 3             | 2MO        | NA            | ToF/PS                 | RV          | Repair                 | NA                         | NA              |
| 4             | 2MO        | F             | ToF/PS                 | RV          | Repair                 | 92 on O <sub>2</sub>       | 61              |
| 6             | 3MO        | M             | ToF/PS                 | RV          | Repair                 | 95                         | 64              |
| 7             | 3MO        | M             | ToF/PS                 | RV          | Repair                 | 95                         | 61              |
| 8             | 4MO        | M             | ToF/PS                 | RV          | Repair                 | 95                         | 67              |
| 9             | 4MO        | NA            | ToF/PS                 | RV          | Repair                 | NA                         | NA              |
| 10            | 4MO        | F             | ToF/PS                 | RV          | Repair                 | 94                         | 61              |
| 11            | 5MO        | M             | ToF/PS                 | RV          | Repair                 | 100                        | 66              |
| 12            | 5MO        | F             | ToF/PS                 | RV          | Repair                 | mid 90s on O <sub>2</sub>  | ND              |
| 13            | 6MO        | NA            | ToF/PS                 | RV          | Repair                 | NA                         | NA              |
| 14            | 6MO        | NA            | ToF/PS                 | RV          | Repair                 | NA                         | NA              |
| 15            | 7MO        | NA            | ToF/PS                 | RV          | Repair                 | NA                         | NA              |
| 16            | 7MO        | M             | VSD                    | RV          | Repair                 | 96                         | 61              |
| 17            | 8MO        | F             | DORV/PS                | RV          | Repair                 | 73                         | 42              |
| 18            | 16MO       | M             | VSD                    | RV          | Repair                 | 98                         | 63              |
| 19            | 2Y         | F             | DCM                    | LV          | LVAD                   | ND                         | 28              |
| 20            | 16Y        | M             | DCM                    | LV          | transplant             | ND                         | 30              |
| 21            | 17Y        | M             | DCM                    | LV          | transplant             | ND                         | 26              |
| 22            | 19Y        | M             | ToF/PS                 | RV          | PVR                    | 96                         | NA              |
| 23            | 21Y        | F             | DCRV, VSD              | RV          | Repair                 | 100                        | 60              |
| 24            | 29Y        | M             | ToF/PS                 | RV          | Repair                 | 95                         | 58              |

Myocardium was resected as part of standard care and collected in a de-identified fashion from the operating rooms at Boston Children's Hospital. Age, gender, cardiac diagnosis, type of surgery, oxygen saturation (SpO<sub>2</sub>), and left ventricular ejection fraction (LVEF) at time of surgery are provided. Age is indicate in days (D), months (MO) and years (Y). Type of surgery: PVR, pulmonary valve replacement; LVAD, Left ventricle assist device. Patient no.4 had diGeorge syndrome; patient no.10 had Alagille syndrome. Abbreviations used: VSD, ventricular septal defect; ToF/PS, tetralogy of Fallot with pulmonary stenosis; DCRV, double-chambered right ventricle; DCM, dilated cardiomyopathy; DORV, double-outlet right ventricle; LV, left ventricle; RV, right ventricle; NA, not available; ND, not done.

**Table S3. Clinical information for normal hearts analyzed for Figure 6C (H3P activity over age).**

| <b>Pt.no.</b> | <b>Age (y)</b> | <b>Age</b> | <b>Gender</b> | <b>Site</b> | <b>Sample ID</b> | <b>Cause of death</b>   |
|---------------|----------------|------------|---------------|-------------|------------------|-------------------------|
| 1             | 0.06           | 3W         | M             | LV          | 6.012            | hypoxic brain injury    |
| 2             | 0.17           | 2MO        | F             | RV          | 4.087            | brain tumor             |
| 3             | 0.17           | 2MO        | F             | LV          | 4.087            | brain tumor             |
| 4             | 1.2            | 14MO       | F             | RV          | 5.114            | drowning                |
| 5             | 2              | 26MO       | M             | RV          | 7.05             | drowning                |
| 6             | 4              | 4Y         | M             | RV          | 4.152            | traumatic head injury   |
| 7             | 16             | 16Y        | M             | RV          | 6.072            | hanged                  |
| 8             | 19             | 19Y        | F             | RV          | 3.168            | subarachnoid hemorrhage |
| 9             | 23             | 23Y        | M             | RV          | 5.138            | brain injury            |

Myocardium was provided by the University of Sydney (Sample ID corresponds to biobank ID). Cause of death was derived from the biobank database. Age is indicated in weeks (W), months (M), and years (Y). Abbreviations used: LV, left ventricle; RV, right ventricle.



**Table S4. Clinical information of patients with heart disease analyzed for Figure 7D (rNRG1 stimulation).**

| Pt.no. | Age  | Gender | Cardiac Disease | Site | Type of surgery | SpO <sub>2</sub> (%)      | LVEF (%) |
|--------|------|--------|-----------------|------|-----------------|---------------------------|----------|
| 1      | 2MO  | NA     | ToF/PS          | RV   | Repair          | NA                        | NA       |
| 2      | 2MO  | F      | ToF/PS          | RV   | Repair          | 92 on O <sub>2</sub>      | 61       |
| 3      | 2MO  | M      | ToF/PS          | RV   | Repair          | high 80's to mid 90       | NA       |
| 4      | 3MO  | M      | ToF/PS          | RV   | Repair          | 95                        | 64       |
| 5      | 3MO  | M      | ToF/PS          | RV   | Repair          | 95                        | 61       |
| 6      | 3MO  | M      | ToF/PS          | RV   | Repair          | 95                        | 56       |
| 7      | 5MO  | M      | ToF/PS          | RV   | Repair          | 100                       | 66       |
| 8      | 5MO  | F      | ToF/PS          | RV   | Repair          | mid 90s on O <sub>2</sub> | NA       |
| 9      | 6MO  | M      | ToF/PS          | RV   | Repair          | 98                        | 60       |
| 10     | 6MO  | NA     | ToF/PS          | RV   | Repair          | NA                        | NA       |
| 11     | 6MO  | NA     | ToF/PS          | RV   | Repair          | NA                        | NA       |
| 12     | 7MO  | NA     | ToF/PS          | RV   | Repair          | NA                        | NA       |
| 13     | 15MO | M      | ToF/PS          | RV   | Repair          | 80's on RA                | 55       |
| 14     | 17MO | M      | ToF/PS          | RV   | Repair          | 100% finger oximetry      | 55       |
| 15     | 3Y   | M      | ToF/PS          | RV   | Repair          | 80                        |          |
| 16     | 4Y   | NA     | ToF/PS          | RV   | Repair          | NA                        | NA       |
| 17     | 11Y  | M      | ToF/PS          | RV   | Repair          | 80                        | 58       |
| 18     | 16Y  | M      | DCM             | LV   | Transplant      | ND                        | 26       |
| 19     | 29Y  | M      | ToF/PS          | RV   | Repair          | 95                        | 58       |
| 20     | 66Y  | M      | ToF/PS          | RV   | Repair          | 96                        | 43.5     |

Myocardium was resected as part of standard care and collected in a de-identified fashion from the operating rooms at Boston Children's Hospital. Age, gender, cardiac diagnosis, type of surgery, oxygen saturation (SpO<sub>2</sub>), and left ventricular ejection fraction (LVEF) at time of surgery are provided. Age is indicated in days (D), months (MO) and years (Y). Abbreviations used: ToF/PS, tetralogy of Fallot with pulmonary stenosis; DCM, dilated cardiomyopathy; LV, left ventricle; RV, right ventricle; NA, not available; ND, not done.

**Table S5. Clinical information of patients with heart disease analyzed for Figure 8G (CFSE Assay).**

| Pt.no. | Age  | Gender | Cardiac Disease | Site | Type of surgery | SpO <sub>2</sub> (%) | LVEF (%) |
|--------|------|--------|-----------------|------|-----------------|----------------------|----------|
| 1      | 2MO  | F      | ToF/PS          | RV   | Repair          | NA                   | 62       |
| 2      | 2MO  | F      | ToF/PS          | RV   | Repair          | 92 on O <sub>2</sub> | 61       |
| 3      | 2MO  | F      | ToF/PS          | RV   | Repair          | 84-90                | 58       |
| 4      | 2MO  | F      | ToF/PS          | RV   | Repair          | ully saturate        | 56       |
| 5      | 3MO  | M      | ToF/PS          | RV   | Repair          | 95                   | 64       |
| 6      | 3MO  | M      | ToF/PS          | RV   | Repair          | 95                   | 61       |
| 7      | 3MO  | M      | ToF/PS          | RV   | Repair          | 95                   | 56       |
| 8      | 6MO  | NA     | ToF/PS          | RV   | Repair          | NA                   | NA       |
| 9      | 6MO  | M      | ToF/PS          | RV   | Repair          | 98                   | 60       |
| 10     | 6MO  | M      | ToF/PS          | RV   | Repair          | > 98 on RA           | NA       |
| 11     | 6MO  | F      | ToF/PS          | RV   | Repair          | 4/9/00               | 63       |
| 12     | 15MO | NA     | VSD             | RV   | Repair          | NA                   | NA       |
| 13     | 16MO | M      | VSD             | RV   | Repair          | 98                   | 63       |
| 14     | 3Y   | M      | ToF/PS          | RV   | Repair          | 80                   | NA       |
| 15     | 5Y   | NA     | ToF/PS          | RV   | Repair          | NA                   | NA       |
| 16     | 10Y  | M      | HCM             | LV   | Myectomy        | 98                   | 66       |

Myocardium was resected as part of standard care and collected in a de-identified fashion from the operating rooms at Boston Children's Hospital. Age, gender, cardiac diagnosis, type of surgery, oxygen saturation (SpO<sub>2</sub>), and left ventricular ejection fraction (LVEF) at time of surgery are provided. Age is indicate in months (MO) and years (Y). Abbreviations used: ToF/PS, tetralogy of Fallot with pulmonary stenosis; VSD, ventricular septal deffect; HCM, hypertrophic cardiac myopathy; LV, left ventricle; RV, right ventricle; NA, Not available.

**Table S6.** Comparison of tissue response after cryoinjury in mice and myocardial disease in human infants (myocardial dysfunction, scar formation, decreased cardiomyocyte cycling).

|                        | <b>Cryoinjury</b> | <b>Human infants with severe heart disease</b> | <b>Comments/ref.</b> |
|------------------------|-------------------|------------------------------------------------|----------------------|
| Myocardial dysfunction | Yes               | Yes                                            | (36)                 |
| Scar                   | Yes               | Yes                                            | (36)                 |
| Cardiomyocyte cycling  | Decreased         | Decreased                                      | This manuscript      |

**Table S7. Antibody manufacturers and dilutions.**

| <b>Antibody/dye</b>                               | <b>Manufacturer</b> | <b>Dilution/concentration</b>  |
|---------------------------------------------------|---------------------|--------------------------------|
| Phosphorylated histone H3 at Ser10 (H3P)          | Millipore           | 1:500                          |
| Sarcomeric $\alpha$ -actinin ( $\alpha$ -actinin) | Sigma               | 1:500                          |
| Alexa- conjugated secondary antibodies            | Invitrogen          | 1:200 to 1:500                 |
| Hoechst                                           | Invitrogen          | 1:1,000                        |
| ApopTag Red In Situ Apoptosis Detection Kit       | Millipore           | Followed Manufacturer protocol |
| Pan-Cadherin                                      | Sigma               | 1:500                          |
| Aurora B kinase                                   | Abcam               | 1:250                          |
| DAPI                                              | Sigma               | 1:1,000                        |
| Connexin 43                                       | Sigma               | 1:200                          |

**Table S8. Image acquisition hardware and settings.**

|                         | <b>Hardware</b>                                                                                                                                                                                             | <b>Software and settings</b>                                       |
|-------------------------|-------------------------------------------------------------------------------------------------------------------------------------------------------------------------------------------------------------|--------------------------------------------------------------------|
| Fig 1A,B,F,G            | Nikon SMZ 1000 stereoscope equipped with Olympus DP70 digital camera                                                                                                                                        | 1-3 sec exposure, Olympus DP Controller                            |
| Fig 1C,I                | Olympus IX-81 spinning disk microscope with UPLAN FLN $\times 4$ , NA 0.13 and LUCPLFL $\times 60$ , NA 0.6 lens equipped with Hamamatsu EM CCD C9100. Zstacks: Range: 10mm; # Planes: 27: Step size: 0.3mm | 20–500 msec exposure, Slidebook                                    |
| Fig. 2H                 | Nikon SMZ 1000 stereoscope equipped with Olympus DP70 digital camera                                                                                                                                        | 1-3 sec exposure, Olympus DP Controller                            |
| Fig. 2L                 | 9.4 T magnet (Bruker Biospin MRI)                                                                                                                                                                           | Image J, Refer to Supplemental Materials and Methods for settings. |
| Fig. 2N (left panels)   | Nikon SMZ 1000 stereoscope equipped with Olympus DP70 digital camera                                                                                                                                        | 1-3 sec exposure, Olympus DP Controller                            |
| Fig. 2N (middle panels) | Nikon A1Rsi Confocal 405nm, 488nm, 561nm, 640nm solid state lasers<br>10x Plan Apo Lambda 0.45NA                                                                                                            | NIS-Elements Acquisition, Stitching and Analysis Software          |
| Fig. 2N (right panels)  | Nikon A1Rsi Confocal 405nm, 488nm, 561nm, 640nm solid state lasers<br>60x Plan Apo Lambda Oil 1.4NA<br>NIS-Elements Acquisition and Analysis Software                                                       | NIS-Elements Acquisition and Analysis Software                     |
| Fig. 3A                 | Leica MZFLIII stereoscope equipped with Olympus DP70 digital camera                                                                                                                                         | 1-3 sec exposure, Olympus DP Controller                            |
| Fig. 3C,E,H             | Olympus IX-81 spinning disk microscope with UPLAN FLN $\times 4$ , NA 0.13 and LUCPLFL $\times 60$ , NA 0.6 lens equipped with Hamamatsu EM CCD C9100. Zstacks: Range: 10mm; # Planes: 27: Step size:       | 20–500 msec exposure, Slidebook                                    |

|            | <b>Hardware</b>                                                                                                                                                                         | <b>Software and settings</b>                   |
|------------|-----------------------------------------------------------------------------------------------------------------------------------------------------------------------------------------|------------------------------------------------|
|            | 0.3mm                                                                                                                                                                                   |                                                |
| Fig. 4B    | Olympus IX-81 spinning disk microscope with UPLAN FLN ×4, NA 0.13 and LUCPLFL ×60, NA 0.6 lens equipped with                                                                            | NIS-Elements Acquisition and Analysis Software |
| Fig. 6A    | Olympus IX-81 spinning disk microscope with UPLAN FLN ×4, NA 0.13 and LUCPLFL ×60, NA 0.6 lens equipped with Hamamatsu EM CCD C9100.                                                    | 20–500 msec exposure, Slidebook                |
| Fig. 7A, C | Olympus IX-81 spinning disk microscope with UPLAN FLN ×4, NA 0.13 and LUCPLFL ×60, NA 0.6 lens equipped with Hamamatsu EM CCD C9100. Zstacks: Range: 20mm; # Planes: 10; Step size: 2mm | 20–500 msec exposure, Slidebook                |
| Fig. 7B    | Nikon A1Rsi Confocal 405nm, 488nm, 561nm, 640nm solid state lasers<br>60x Plan Apo Lambda Oil 1.4NA<br>NIS-Elements Acquisition and Analysis Software                                   | NIS-Elements Acquisition and Analysis Software |

**Table S9. Quantification of numeric data.**

| <b>Figure</b> | <b>Assay</b>                          | <b>Number of cardiomyocytes and/or hearts analyzed</b>                    |
|---------------|---------------------------------------|---------------------------------------------------------------------------|
| Fig.1D        | TUNEL Apoptosis                       | 12 hearts analyzed, 3-5 sections/heart, 1 image/slide, 40x magnification  |
| Fig. 1E       | EF, echocardiography                  | 40MHz probe, 153 animals analyzed                                         |
| Fig. 1H       | Fibrosis analysis                     | 24 hearts analyzed, 10-15 sections/heart, 1 image/slide, 1x magnification |
| Fig. 1J       | H3P positive cardiomyocytes           | 5 -10 sections/heart, 35 hearts analyzed                                  |
| Fig. 2B,E     | EF, echocardiography                  | 40MHz probe, 159 animals analyzed                                         |
| Fig. 2C,F     | EF, cMRI                              | 22 animals analyzed                                                       |
| Fig. 2D,G     | Heart weight/tibia length             | 79 hearts weighed                                                         |
| Fig. 2I,J     | Fibrosis analysis                     | 69 hearts analyzed, 10-15 sections/heart, 1 image/slide, 2x magnification |
| Fig. 2K       | Hearts with transmural scar           | 69 hearts analyzed, 10-15 sections/heart, 1 image/slide, 2x magnification |
| Fig. 2M       | Left ventricular free wall thickening | 22 hearts analysed, cMRI                                                  |
| Fig. 3B       | Hematoma size                         | 11 animals analyzed                                                       |
| Fig.3D        | TUNEL Apoptosis                       | 11 hearts analyzed, 3-5 sections/heart, 1 image/slide, 40x magnification  |
| Fig. 3F,G     | H3P positive cardiomyocytes           | 5 -10 sections/heart, 56 hearts analyzed                                  |
| Fig. 3I       | Aurora B positive cardiomyocytes      | 5 -10 sections/heart, 11 hearts analyzed                                  |

| <b>Figure</b> | <b>Assay</b>                  | <b>Number of cardiomyocytes and/or hearts analyzed</b>                       |
|---------------|-------------------------------|------------------------------------------------------------------------------|
| Fig. 3J,K     | Stereology –CM nuclei density | 11 hearts analyzed, 10-15 sections/heart, 5-7 image/slide, 60x magnification |
| Fig. 4C       | H3P positive cardiomyocytes   | 11 hearts analysed, 3-5 sections/ heart, 1 image/ slide, 40x magnification   |
| Fig. 5A       | RNA-Seq heat map              | 15 hearts analysed (5 biological replicates were group)                      |
| Fig. 6C       | H3P positive cardiomyocytes   | 33 human hearts analyzed                                                     |
| Fig. 7D       | H3P positive cardiomyocytes   | 44 human hearts analyzed                                                     |
| Fig. 8G       | Proliferating cardiomyocytes  | 16 human hearts analyzed                                                     |



**Table S10. Human primers for qRT-PCR for calculation of fold change in expression levels**

| <b>Gene</b> | <b>Forward Primer</b>            | <b>Reverse Primer</b>            |
|-------------|----------------------------------|----------------------------------|
| GAPDH       | 5'-ACCACAGTCCATGCCATCAC-3'       | 5'-TCCACCACCCTGTTGCTGT-3'        |
| C-kit       | 5'-AGCAAATCCATCCCCACACC-3'       | 5'-GGCTTGAGCATCTTTACAGCGAC-3'    |
| cTNT        | 5'-GGCAGCGGAAGAGGATGCTGAA-3'     | 5'-GAGGCACCAAGTTGGGCATGAACGA-3'  |
| DDR2        | 5'-TGTTCCCTGCTGCTGCCTATCTT-3'    | 5'-AGGATAGCGGCATATAGCTGGAT-3'    |
| CD31        | 5'-ATTGCAGTGGTTATCATCGGAGTG-3'   | 5'-CTCGTTGTTGGAGTTCAGAAGTGG-3'   |
| b-MHC       | 5-CAGTACATGCTGACAGACAGA-3'       | 5-GCACATCAAAAGCGTTATCAG-3'       |
| Ki-67       | 5'-CTTTGGGT-GCGACTTGACG-3'       | 5'-GTCGACCCCGCTCCTTTT-3'         |
| CCD1        | 5'-TTCATGTGGGCATTTCTTGCGAGC-3'   | 5'-CTGCCATTTGCTAGCAGTGTGACT-3'   |
| CDKB1       | 5'-CAGTCAGACCAAAATACCTACTGGGT-3' | 5'-ACACCAACCAGCTGCAGCATCTTCTT-3' |
| CDKA        | 5'-GCCATTAGTTTACCTGGACCCAGA-3'   | 5'-CACTGACATGGAAGACAGGAACCT-3'   |

**Supplemental Table S11. Mouse primers for qPCR for calculation of fold change in expression levels**

| <b>Gene</b> | <b>Forward Primer</b>         | <b>Reverse Primer</b>           |
|-------------|-------------------------------|---------------------------------|
| ErbB4       | 5'- ACTATATGAAGATCGCTATGCC-3' | 5'- CCACCATTTAGTATTTCCGGTCAG-3' |
| HPRT        | 5'- TGATTAGCGATGATGAACCA-3'   | 5'- GCAAGTCTTTCAGTCCTGTC-3'     |

*Captions for Supplemental Movies (S1-S5).*

**Supplemental Movie S1. BSA-treated mouse from early administration.** Representative movie of cMRI frames at the level of papillary muscles at 64 dpi.

**Supplemental Movie S2. rNRG1-treated mouse from early administration.** Representative movie of cMRI frames at the level of papillary muscles at 64 dpi.

**Supplemental Movie S3. BSA-treated mouse from late administration.** Representative movie of cMRI frames at the level of papillary muscles at 64 dpi.

**Supplemental Movie S4. rNRG1-treated mouse from late administration.** Representative movie of cMRI frames at the level of papillary muscles at 64 dpi.

**Supplemental Movie S5. 3D reconstructions show myocardial syncytium adjacent to the scar after early administration (64 dpi).** Histologic heart sections (20  $\mu\text{m}$ ) through the injury site after early administration. Cardiac sarcomeres are depicted in red ( $\alpha$ -actinin), gap junctions in green (Connexin 43), and nuclei in blue (Hoechst). Movies were generated from optical confocal sections 0.3  $\mu\text{m}$  apart. A BSA-treated heart shows a scar (blue nuclei) lacking Connexin 43 positive cardiomyocytes (left movie, corresponding to Fig. 2N, top right panel). In contrast, an rNRG1 treated heart after early administration shows a scar with adjacent Connexin 43 cardiomyocytes (right movie, corresponding to Fig. 2N, bottom right panel).
